# Supplementary material
Source: Royal Society of Chemistry journal article supplement (doi:10.1039/d5ma01450f)
Supplement: d5ma01450f1.pdf [file d5ma01450f1.pdf]

Supporting information

## Light-triggered and Nanocarrier Properties of Nitrogen-doped Carbon Nanodots

Ludovica Maugeri,<sup>a†</sup> Grazia Maria Letizia Consoli,<sup>b†</sup> Giuseppe Forte,<sup>a</sup> Giorgia Fangano,<sup>a</sup> Loredana Ferreri,<sup>b</sup> Giuseppe Granata<sup>b</sup>, Paolo Giuseppe Bonacci,<sup>c,e</sup> Nicolò Musso,<sup>d,e</sup> Luca Lanza<sup>d,f</sup>, Elisa Longo<sup>f</sup>, Marcello Marelli,<sup>g</sup> Angelo Ferlazzo<sup>h</sup>, Antonino Gulino<sup>h</sup> and Salvatore Petralia<sup>\*a,b,e</sup>

<sup>a</sup> Department of Drug and Health Sciences, University of Catania, 95123 Catania, Italy

<sup>b</sup> CNR-Institute of Biomolecular Chemistry, 95126 Catania, Italy

<sup>c</sup> Department of Biomedical and Biotechnological Sciences, University of Catania, 95123 Catania, Italy

<sup>d</sup> Faculty of Medicine and Surgery, "Kore" University of Enna, Contrada Santa Panasia, 94100 Enna, Italy

<sup>e</sup> AIDA srl via S. Sofia, 97 Torre Biologica, 95123 Catania Italy

<sup>f</sup> Department of Physics and Astronomy "Ettore Majorana" University of Catania, 95123 Catania, Italy

<sup>g</sup> CNR-Institute of Science and Chemical Technologies "Giulio Natta", 20138 Milano, Italy

<sup>h</sup> Department of Chemical Sciences, University of Catania, 95123 Catania, Italy

\*corresponding author: Salvatore Petralia: e-mail: salvatore.petralia@unict.it

### Contents

**Figure S1.** Emission spectra of CDs-chit nanostructures in water at different pH.

**Figure S2.** Representative TEM micrographs for CDs-chit nanostructures.

**Figure S3.** <sup>1</sup>H-NMR spectrum of Cdots-chit in deuterated water.

**Figure S4.** Optical absorption spectra of CDs-chit prepared at 300 °C for 4 hrs in air and dissolved in water.

**Figure S5.** Hydrodynamic diameter and Z-potential measurements of CDs-chit (1 mg mL<sup>-1</sup>) in water at different pH values.

**Figure S6.** Linear relationship between time (sec) and -ln( $\theta$ ), the slope is the time constant ( $\tau_s$ ) for photothermal experiments at laser wavelength 405 nm and laser power 210 mW.

**Figure S7.** Dark control experiment: Optical absorption spectra of Au-nanostructures formation.

**Figure S8.** CDs-chit/Au photothermal experiments: photothermal cycles.

**Figure S9.** CDs-chit/Au photothermal experiments.

**Figure S10.** Optical absorption spectra changes of CDs-chit/MB (1 mg ml<sup>-1</sup>) water dispersion upon UV-light irradiation in deaerated condition.

**Figure S11.** Optical absorption spectra changes of CDs-chit/MB (1 mg ml<sup>-1</sup>) water dispersion upon UV-light irradiation in dark condition.

**Figure S12.** Absorption spectra of the aggregate 1-a at CAM-B3LYP/6-311+G(d,p)/CPCM level.

**Figure S13.** Representation of the simulated model in water solvent; curcumin is represented in yellow, chitosan in grey.

**Figure S14.** Stability test: Absorbance@350nm for Cds-chit in water over time: 0.5, 1, 3 and 6 months.

**Figure S15.** Optical spectra spectra of Cds-chit/curc in PBS at 0 and 6 months form the preparation.

**Table S1.** Biophotometer and Qubit quantification related to RNA extraction.

**Table S2.** Supported Combinations provided for the generation of the Illumina protocol followed for the preparation of the libraries.

**Table S3.** Fold change data calculated for HCT-116 cell line treated with CDs-chit.

**Table S4.** Fold change data calculated for HeLa-116 cell line treated with CDs-chit.

**Table S5.** XPS peaks assignment.

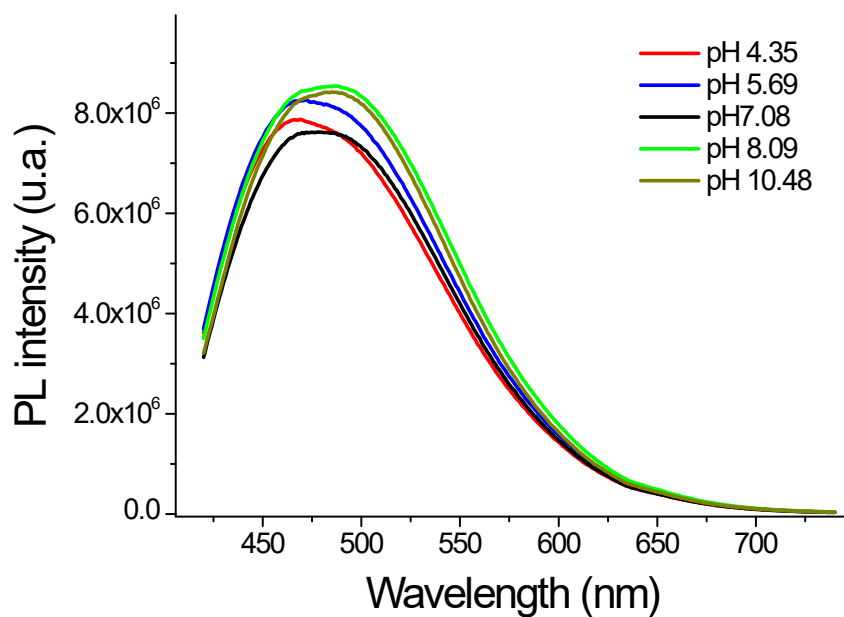

**Figure S1.** Emission spectra of CDs-chit nanostructures in water at different pH: 4.35, 5.7, 7.08, 8.39 and 10.5 ( $\lambda_{exc.}=400$  nm,  $Abs_{400nm}=0.13$ , slits 2/2 mm)

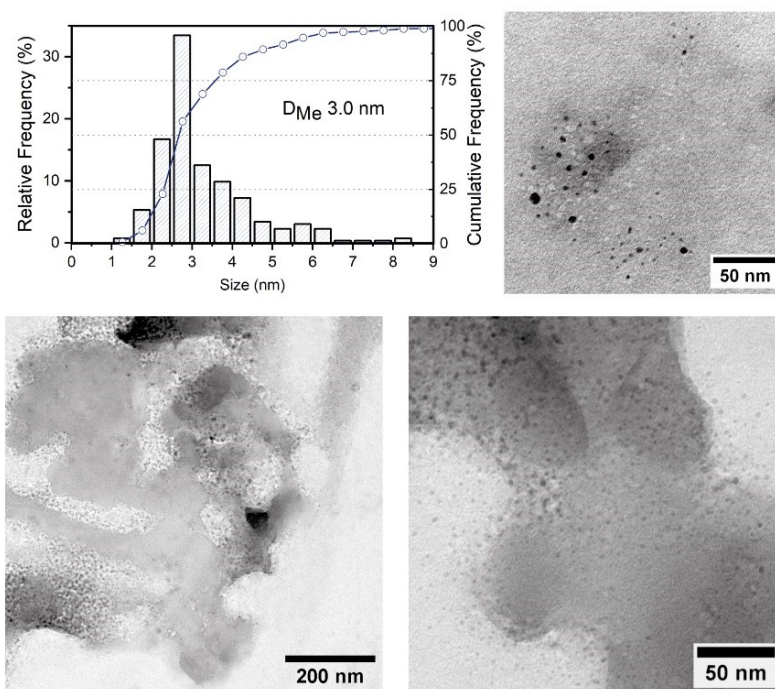

**Figure S2.** Size Distribution Graph and representative TEM micrographs for CDs-chit nanostructures. Spherical nanoparticles appear relatively homogeneous in size without agglomerates or oversized nanoparticles.

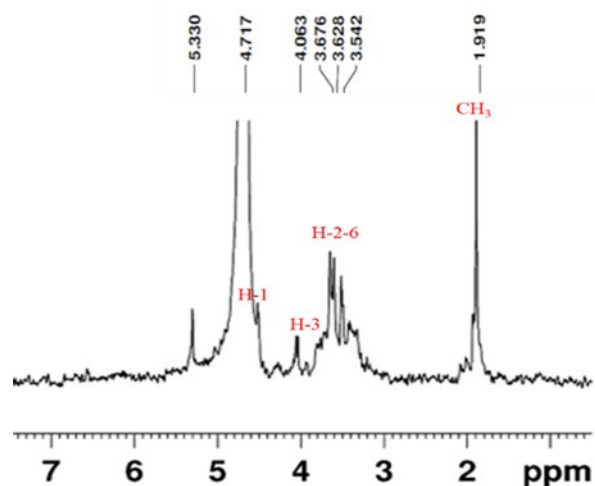

**Figure S3.** <sup>1</sup>H-NMR spectrum of Cdots-chit (400.13 MHz, D<sub>2</sub>O, 297 K).

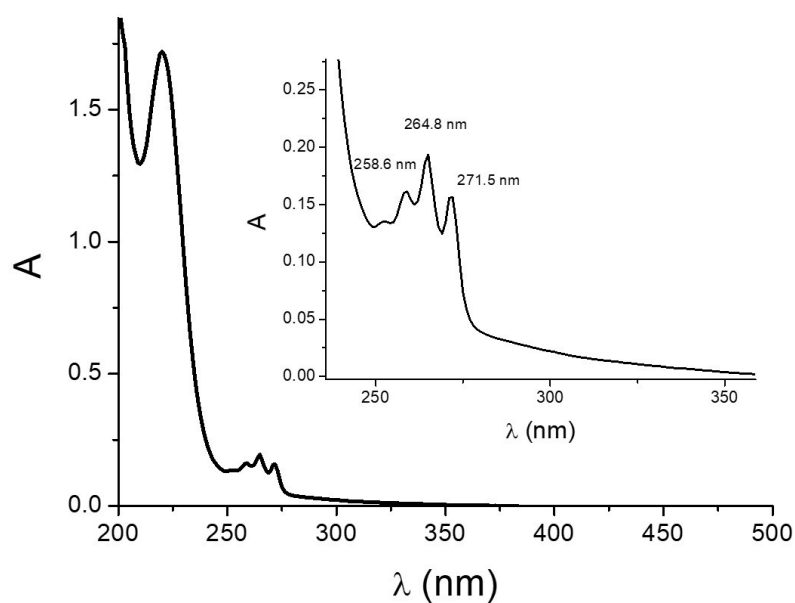

**Figure S4.** Optical absorption spectra of the CDs prepared at 400 °C for 4 hrs in air and dissolved in water (pH 7.2). Experiments, performed at high 400 °C for 4 hrs) exhibits the formation of CDs with typical optical absorption spectrum of polyaromatic structures (Figure S1). Moreover, the lower water dispersibility of this fully carbonized nanostructures agreed with the complete carbonization of chitosan to form CDs core.

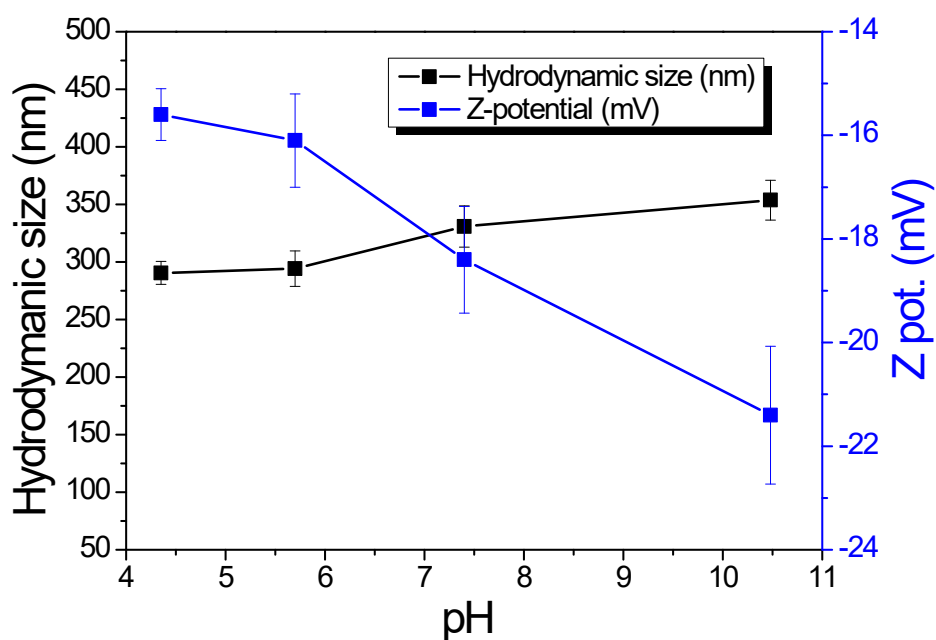

**Figure S5.** Hydrodynamic diameter and Z-potential measurements of CDs-chit (1 mg mL<sup>-1</sup>) in water at different pH values.

### Photothermal conversion efficiency ( $\eta$ )

Photothermal measurements were performed irradiating a volume of 100  $\mu$ L of CDs-chit dispersion for 10 minutes in a glass tube (diameter 3 mm), using continuous wave Laser at different laser power and at different wavelength excitation (405 and 808 nm). A standard infrared thermal imaging camera was used to measure the temperature of the solution every 20 seconds, during the heating and cooling processes. The photothermal conversion efficiency ( $\eta$ ) was calculated according to equation (1) introduced by Roper

$$\eta = \frac{hA(T_{max} - T_{surr}) - Q_{Dis}}{I(1 - 10^{-A})} \quad (1)$$

Where  $T_{max}$  and  $T_{surr}$  represents the max photothermal temperature and the ambient temperature respectively,  $I$  is the incident laser power and  $A$  is the absorbance value of CDs-chit dispersion at the wavelength excitation. The equations (2) and (3) were introduced to calculate the parameter  $hA$ .

$$\theta = \frac{T - T_{surr}}{T_{max} - T_{surr}} \quad (2)$$

$$\tau = \frac{M_D C_D}{hA} \quad (3)$$

where MD and CD are the mass (0.1 g) and heat capacity (4.2 J g<sup>-1</sup>) of water respectively, and  $\tau_s$  is the time constant, calculated by the equation (4).

$$t = -\tau(\ln\theta) \quad (4)$$

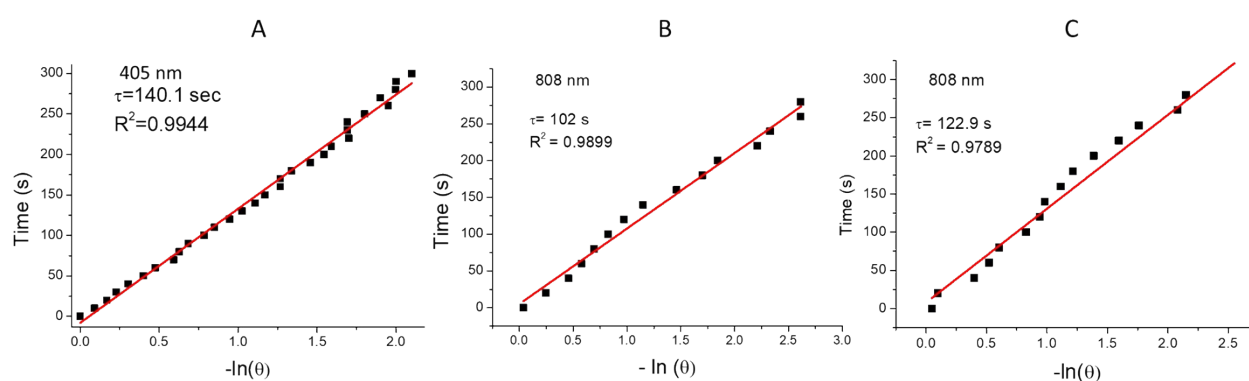

**Figure S6.** Linear relationship between time (sec) and  $-\ln(\theta)$ , the slope is the time constant ( $\tau_s$ ) for photothermal experiments of: A) CDs-chit sample ( $A_{ss} = 4.5$ ) upon excitation with laser wavelength 405 nm (power 211 mW), B) CDs-chit sample (3.3 mg mL<sup>-1</sup>) upon excitation with laser wavelength 808 nm (1 W) and C) CDs-chit sample (6.6 mg mL<sup>-1</sup>) upon excitation with laser wavelength 808 nm (1 W).

## Photochemical preparation of CDs-chit/Au nanostructures

The formation of CDs-chit/Au nanostructures at different concentrations of  $\text{HAuCl}_4$  precursor ( $5.6 \times 10^{-5} \text{ M}$ ,  $1.6 \times 10^{-4} \text{ M}$ , and  $4.8 \times 10^{-4} \text{ M}$ ), after degassing with argon (15 min), was observed at different irradiation times using two UV lamps operating at 300 nm as well as assessments conducted under dark conditions. The same experiment was performed for the chitosan precursor (1 mg/ml

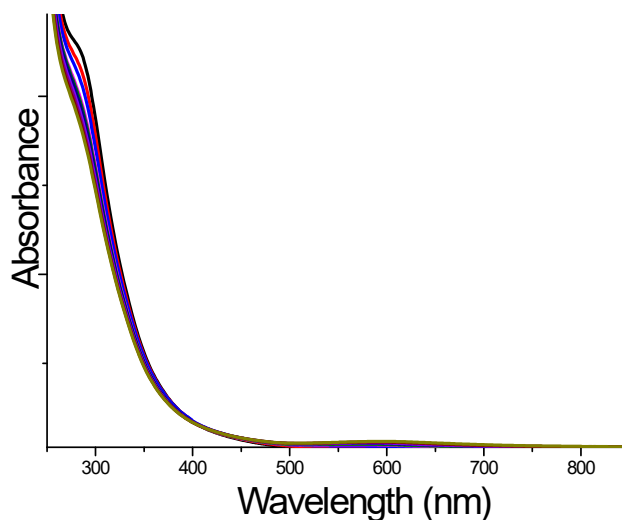

precursor and  $1.6 \times 10^{-4} \text{ M HAuCl}_4$ ).

**Figure S7.** Dark control experiment: Optical absorption spectra of Au-nanostructures formation using 0.53 mM  $\text{HAuCl}_4$  in water and CDs-chit ( $1 \text{ mg mL}^{-1}$ ), without light, at different time from 0 to 120 min.

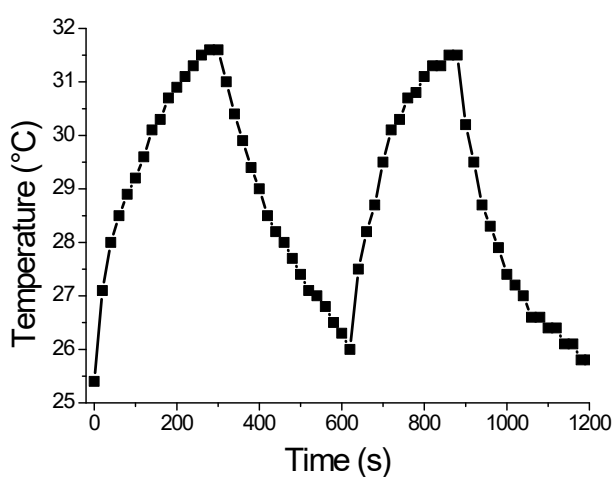

**Figure S8.** CDs-chit/Au photothermal experiments: photothermal cycles (laser 532 nm, laser power 200mW)

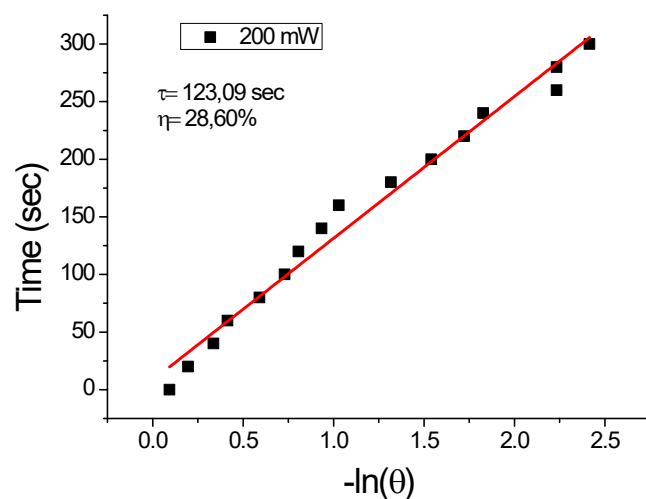

**Figure S9.** CDs-chit/Au photothermal experiments: Linear relationship between time (s) and  $-\ln(\theta)$ , the slope is the time constant ( $\tau_s$ ) for photothermal experiments at laser wavelength 532 nm and laser power 200 mW.

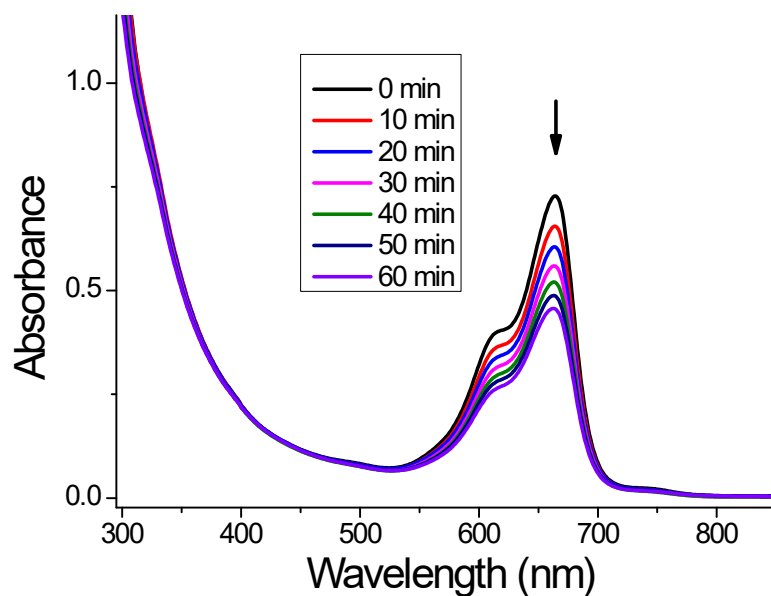

**Figure S10.** Optical absorption spectra changes of CDs-chit/MB (1 mg ml<sup>-1</sup>) water dispersion upon UV-light irradiation (10, 20, 30, 40, 50 and 60 min, 2 lamps 300 nm) in aerated condition.

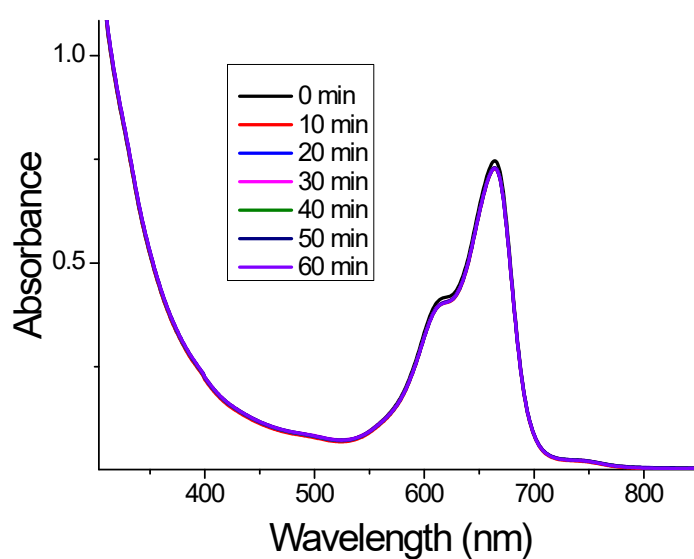

**Figure S11.** Optical absorption spectra changes of CDs-chit/MB ( $1 \text{ mg ml}^{-1}$ ) water dispersion upon UV-light irradiation (10, 20, 30, 40, 50 and 60 min,) in dark condition.

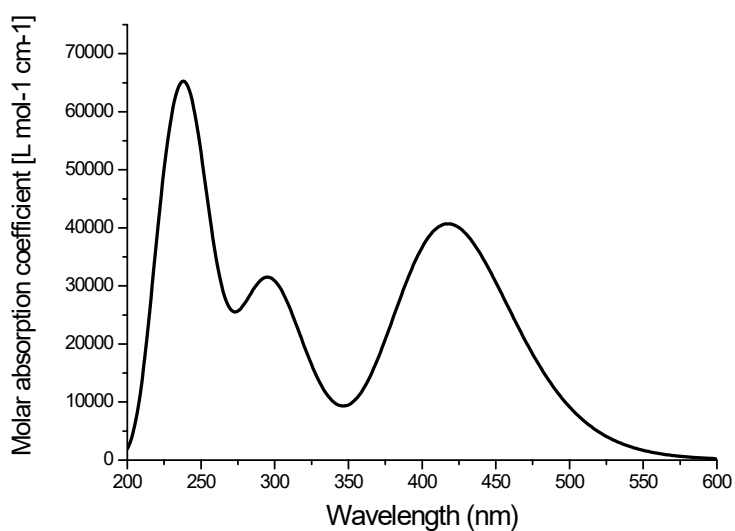

**Figure S12.** Absorption spectra of the aggregate 1-a at CAM-B3LYP/6-311+G(d,p)/CPCM level.

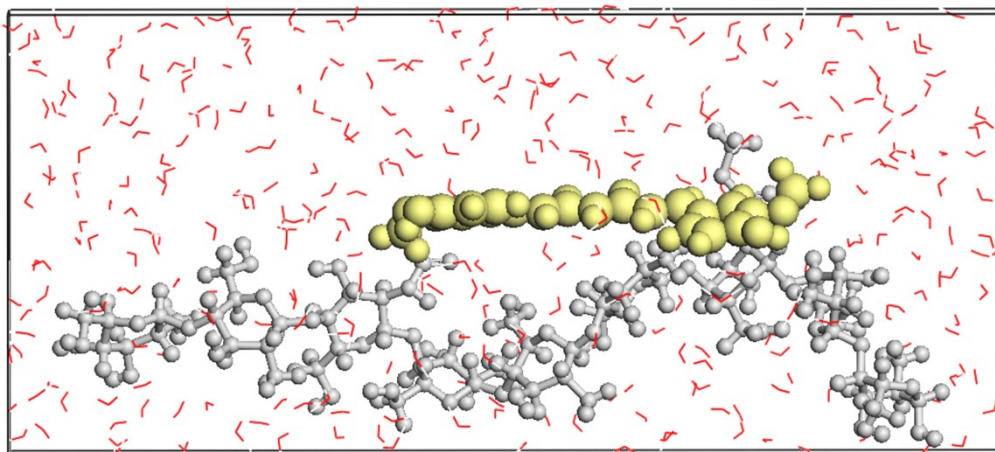

**Figure S13.** Representation of the simulated model in water solvent; curcumin is represented in yellow, chitosan in grey.

### **RNAseq Experiment**

HeLa and HCT 116 cells were plated in a 6-well plate (Cat. No. 30006, SPL Life Sciences Co., Ltd. 48, Geumgang-ro 2047 beon-gil, Naechon-Myeon, Pocheon-si, Gyeonggi-do 487 835, Korea) at a concentration of 100.000 cell per well and after 24 hours, they were treated for 6 hours with a concentration of CDs-Chit/Cur nanoparticles equal to  $40 \text{ ng } \mu\text{L}^{-1}$ , that in a working volume of  $500 \text{ } \mu\text{L}$  corresponds to  $20 \text{ } \mu\text{g}$  per well. Each treatment was carried out in triplicate. Untreated cells were used as a control. After six hours, cells supernatant was removed and cells were resuspended in  $300 \text{ } \mu\text{L}$  of RLT Buffer (Cat. 74104, Qiagen, Hilden, Germany) with a concentration of  $\beta$ - mercaptoethanol (Cat. M6250, Merck, 126 East Lincoln Avenue P.O. Box 2000. Rahway 07065, United States) equal to  $10 \text{ } \mu\text{L mL}^{-1}$  and in  $300 \text{ } \mu\text{L}$  of 70% ethanol. The cells were finally frozen at  $-80 \text{ } ^\circ\text{C}$  awaiting RNA extraction.

### **RNA extraction and quantification**

The RNA has been extracted following the manufacturer's instructions of the Qiamp RNeasy Mini Kit (Cat. 74104, Qiagen, Hilden, Germany); the integrity and the quantification of the RNA were attest using Agilent RNA 6000 Nano Kit (Cat. 5067-1511, Agilent, Santa Clara, CA 95051, USA) on a 2100 Bioanalyzer Instrument (Cat. G2939BA, Agilent, Santa Clara, CA 95051, USA) and also using Qubit™ RNA HS Assay Kit (Cat. 2390601, Invitrogen, Eugene, Oregon, USA) on a Qubit 4 Fluorometer instrument (Cat. Q33238, Invitrogen, Eugene, Oregon, USA). The samples and their quantifications are given in Table x.

**Table S1.** Biophotometer and Qubit quantification related to RNA extraction. Qubit quantification is expressed as average of triplicate.

| Number | Sample               | Biophotometer<br>Quantification (ng/ $\mu$ L) | Qubit Quantification<br>(Average, ng/ $\mu$ L) |
|--------|----------------------|-----------------------------------------------|------------------------------------------------|
| 1      | HeLa<br>Untreated    | 72.1                                          | 87.8                                           |
| 2      |                      | 69.3                                          |                                                |
| 3      |                      | 77.2                                          |                                                |
| 4      | Hela Treated         | 50.5                                          | 69.3                                           |
| 5      |                      | 79.4                                          |                                                |
| 6      |                      | 89.6                                          |                                                |
| 7      | HCT-116<br>Untreated | 80.3                                          | 77.3                                           |
| 8      |                      | 57.63                                         |                                                |
| 9      |                      | 45.4                                          |                                                |
| 10     | HCT-116<br>Treated   | 50.8                                          | 45.8                                           |
| 11     |                      | 84.1                                          |                                                |
| 12     |                      | 75.2                                          |                                                |

**Table S2.** Supported Combinations provided for the generation of the Illumina protocol followed for the preparation of the libraries.

|                          |                                                      |
|--------------------------|------------------------------------------------------|
| Sequencing<br>Instrument | MiSeq                                                |
| Library Preparation Kit  | AmpliSeq for Illumina Custom and Community<br>Panels |
| Input Material           | Only RNA protocol                                    |
| Indexing                 | Dual Indexing                                        |
| Reagent Kits             | MiSeq Reagent Kit v3                                 |



**Table S3.** Fold change data calculated for HCT-116 cell line treated with CDs-chit.

| HCT-116 | Max group mean | Log <sub>2</sub> fold change | Fold change | P-value |
|---------|----------------|------------------------------|-------------|---------|
| ABCC1   | 720.68         | 0.22                         | 1.17        | 0.49    |
| ABCC2   | 3,643.47       | 0.23                         | 1.17        | 0.59    |
| BAX     | 3,202.63       | -0.46                        | -1.38       | 0.32    |
| BCL2    | 30.13          | -0.62                        | -1.54       | 0.39    |
| CAT     | 3,366.31       | -0.31                        | -1.24       | 0.45    |
| CCL5    | 4.51           | 2.01                         | 4.03        | 0.3     |
| CHRNA2  | 1.42           | 3.36                         | 10.27       | 0.14    |
| CHRN2   | 0.56           | -2.9                         | -7.44       | 0.52    |
| GCLC    | 8,310.76       | 0.5                          | 1.42        | 0.02    |
| GCLM    | 4,498.82       | 0.41                         | 1.33        | 0.4     |
| GPX1    | 54,335.49      | -0.52                        | -1.43       | 0.26    |
| GSTP1   | 47,663.06      | 0.01                         | 1.01        | 0.96    |
| HMBS    | 1,854.51       | -0.13                        | -1.1        | 0.75    |
| HMOX1   | 5,024.49       | -0.2                         | -1.15       | 0.63    |
| IDE     | 4,074.58       | 0.11                         | 1.08        | 0.67    |
| IL10    | 1,24           | -2.55                        | -5.84       | 0,58    |
| IL1B    | 512,33         | -9.34                        | -647.15     | 0,07    |
| IL1RN   | 37.19          | 0.88                         | 1.85        | 0.28    |
| IL6     | 994.56         | -6.18                        | -72.28      | 0.01    |
| IL8     | 2.647.18       | -1.21                        | -2.31       | 0.14    |
| JUN     | 4.43           | -1.49                        | -2.81       | 0.34    |
| KCNK13  | 461.69         | -0.32                        | -1.25       | 0.15    |
| KEAP1   | 3,168.35       | 0.05                         | 1.04        | 0.88    |
| LRP1    | 129.83         | -0.18                        | -1.13       | 0.6     |
| MMP2    | 5.27           | 1.33                         | 2.51        | 0.54    |
| MMP9    | 1.75           | -3.18                        | -9.04       | 0.48    |
| MRPL13  | 313.38         | 0.02                         | 1.02        | 0.97    |
| NFE2L2  | 6,157.34       | 0.82                         | 1.76        | 0.06    |
| NFKB1   | 2,071.30       | 0.27                         | 1.2         | 0.53    |
| NQO1    | 21,709.60      | 0.28                         | 1.21        | 0.51    |

|               |           |       |       |      |
|---------------|-----------|-------|-------|------|
| <b>PARK7</b>  | 31,854.19 | -0.6  | -12   | 0.31 |
| <b>PRDX1</b>  | 2,066.81  | 0.08  | 1.05  | 0.8  |
| <b>PRDX3</b>  | 39,553.13 | -0.02 | -1.01 | 0.95 |
| <b>PTGS2</b>  | 293.37    | -0.1  | -1.07 | 0.89 |
| <b>SOD1</b>   | 77,329.17 | -0.18 | -1.13 | 0.61 |
| <b>SOD2</b>   | 2,827.36  | -0.16 | -1.12 | 0.41 |
| <b>SRXN1</b>  | 2,925.22  | 0.28  | 1.21  | 0.59 |
| <b>TGFB1</b>  | 6,000.67  | -0.23 | -1.17 | 0.45 |
| <b>TGFBR2</b> | 378.68    | 0.18  | 1.14  | 0.84 |
| <b>TNF</b>    | 0.49      | -1.4  | -2.64 | 0.76 |
| <b>TXN</b>    | 58,116.93 | -0.16 | -1.12 | 0.35 |
| <b>TXN2</b>   | 19,196.80 | -0.05 | -1.03 | 0.81 |
| <b>TXNRD1</b> | 35.7      | 0.12  | 1.09  | 0.93 |
| <b>VEGFB</b>  | 4,778.08  | -0.17 | -1.13 | 0.65 |

---

**Table S4.** Fold change data calculated for HeLa-116 cell line treated with CDs-chit.

| HeLa   | Max group mean | Log <sub>2</sub> fold change | Fold change | P-value |
|--------|----------------|------------------------------|-------------|---------|
| ABCC1  | 86.74          | 0,25                         | 1.19        | 0.77    |
| ABCC2  | 62.63          | -0.78                        | -1.71       | 0.54    |
| BAX    | 1,563.70       | -0.19                        | -1.14       | 0.59    |
| CAT    | 1,960.56       | 0.13                         | 1.1         | 0.84    |
| CCL2   | 311.82         | 0.7                          | 1.63        | 0.69    |
| CCL5   | 13.27          | -1.83                        | -3.56       | 0.48    |
| GCLC   | 1,745.62       | 0.49                         | 1.41        | 0.6     |
| GCLM   | 4,123.44       | 0.22                         | 1.16        | 0.79    |
| GPX1   | 80,271.05      | 0.6                          | 1.51        | 0.59    |
| GSTP1  | 5,428.89       | 0.51                         | 1.42        | 0.68    |
| HMBS   | 5,751.07       | -0.01                        | -1.01       | 0.98    |
| HMOX1  | 24,241.53      | 0.66                         | 1.58        | 0.52    |
| IDE    | 2,990.18       | 0.43                         | 1.35        | 0.34    |
| IL1B   | 26.96          | 1.92                         | 3.79        | 0.53    |
| IL6    | 2,281.86       | -0.28                        | -1.21       | 0.83    |
| IL8    | 3,115.79       | -0.57                        | -1.49       | 0.73    |
| JUN    | 34.6           | 0.75                         | 1.68        | 0.7     |
| KEAP1  | 613.93         | 0.2                          | 1.15        | 0.78    |
| LRP1   | 824.08         | 0.28                         | 1.21        | 0.71    |
| MMP2   | 941.69         | 0.13                         | 1.09        | 0.65    |
| NFE2L2 | 2,130.13       | 0.24                         | 1.18        | 0.83    |
| NFKB1  | 424.7          | 0.17                         | 1.13        | 0.73    |
| NQO1   | 19,618.07      | 0.64                         | 1.56        | 0.62    |
| PARK7  | 47,941.35      | 1.05                         | 2.07        | 0.32    |
| PRDX1  | 4,924.10       | 0.13                         | 1.1         | 0.77    |
| PRDX3  | 24,352.09      | 0.8                          | 1.75        | 0.46    |
| PTGS2  | 501.22         | 0.31                         | 1.24        | 0.63    |
| SOD1   | 51,714.48      | 0.66                         | 1.58        | 0.59    |
| SOD2   | 2,539.99       | 0.75                         | 1.68        | 0.39    |
| SRXN1  | 1,773.15       | -0.09                        | -1.07       | 0.88    |

|               |           |       |       |      |
|---------------|-----------|-------|-------|------|
| <b>TGFB1</b>  | 13,505.91 | 0.65  | 1.57  | 0.51 |
| <b>TGFBR2</b> | 80.51     | -0.33 | -1.25 | 0.8  |
| <b>TNF</b>    | 10.93     | 1.92  | 3.79  | 0.48 |
| <b>TXN</b>    | 55,142.76 | 0.4   | 1.32  | 0.72 |
| <b>TXN2</b>   | 12,413.53 | 0.41  | 1.33  | 0.68 |
| <b>VEGFB</b>  | 22,097.49 | 0.67  | 1.59  | 0.42 |

---

**Table S5.** XPS peaks assignment.

| <b>Species</b> | <b>chitosan</b> | <b>CDs_chitosan</b> | <b>assignment</b>            |
|----------------|-----------------|---------------------|------------------------------|
| C 1s           | ----            | 284.3               | sp <sup>2</sup>              |
|                | 285.0           | 285.0               | sp <sup>3</sup> C-C, C-H     |
|                | 285.5           | 285.5               | C-N                          |
|                | 286.5           | 286.4               | C-OH                         |
|                | 288.1           | 288.2               | O-C-O, C=O                   |
| O 1s           | 531.1           | 531.5               | C=O                          |
|                | 532.7           | 532.5               | C-O                          |
|                |                 | 533.9               | H <sub>2</sub> O             |
| N 1s           | 399.3           | 399.6               | -NH <sub>2</sub> , C-N-C,    |
|                | 400.3           | 400.6               | N-C=O                        |
|                | 401.6           | 401.9               | N <sup>+</sup> , graphitic N |

---

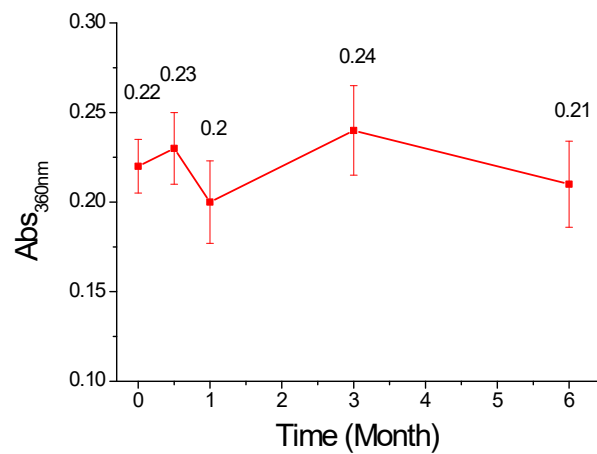

**Figure S14.** Stability test: Absorbance@350nm for Cds-chit in water over time: 0.5, 1, 3 and 6 months.

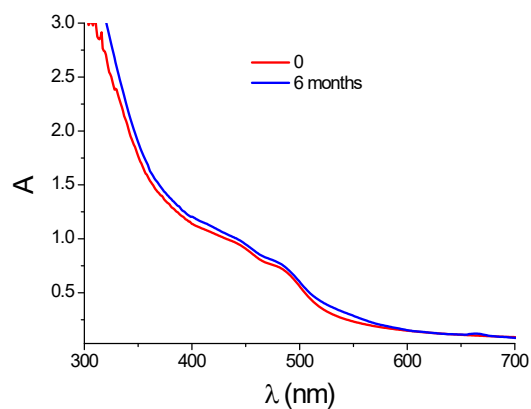

**Figure S15.** Optical spectra spectra of Cds-chit/curc in PBS at 0 and 6 months from the preparation.
